# Supplementary material for: From city centre to urban edge: habitat heterogeneity and environmental filtering determine breeding bird community structure in an expanding Mediterranean city
Source: Research Square preprint supplement (doi:10.21203/rs.3.rs-8377834/v1), 2025-12-31
Supplement: Supplementary file 1 [file c90add92112a9ba0967e952a.docx]

**Supplementary material 1**: Coverage of the main eight habitat in the whole area of Pamplona (MUNICIPALITY), in the area covered by the 80 200-m length transects (ALL SAMPLES), and in the subset of transects carried out at less of 1500 m from town centre (n=23) and at more than 2700 m (PERIPHERY, n=24). Habitat diversity (Shannon-Weiner index) was estimated considering 14, more detailed, habitat categories (considering oak woodlands, afforestations with deciduous trees and coniferous plantations for woodlands; pastures, grasslands with scattered bushes and Mediterranean shrublands for areas covered by shrubs; wooded crops, cereal crops and urban orchards for urban vegetable gardens).

|  | MUNICIPALITY | ALL SAMPLES | TOWN CENTRE | PERIPHERY |
| --- | --- | --- | --- | --- |
| Gardens (%) | 20.88 | 24.97 | 33.07 | 14.25 |
| Water (river, ponds) (%) | 1.89 | 2.58 | 2.51 | 3.29 |
| Streets/avenues (%) | 24.41 | 24.45 | 28.52 | 18.93 |
| Buildings (%) | 19.66 | 19.59 | 28.94 | 13.32 |
| Woodlands (%) | 3.95 | 2.87 | 1.30 | 6.64 |
| Areas covered by shrubs (%) | 6.06 | 5.50 | 0.36 | 12.88 |
| Urban vegetable gardens (%) | 17.90 | 13.67 | 3.82 | 21.28 |
| Other urban habitats (%) | 5.25 | 6.37 | 1.50 | 9.40 |
| Habitat diversity | 1.99 | 1.95 | 1.46 | 2.18 |

**Supplementary material 2**: Bird species found in the bird surveys in the municipality of Pamplona. The following information obtained in the field is provided for each species. **birds/transect** and 95% confidence intervals (**IC95%low**, **IC95%upp**): average number of individual birds detected in each line transect of 200-m length with survey belts of 150 m at both sides of the observer (N=80 transects; confidence intervals obtained by means of 20,000 bootstraps applying the bias corrected accelerated method). **frequency**: frequency of occurrence of each species in the sample of 80 200-m length transects. **frequency_CEN**: frequency of occurrence in the subset of transects sampled less than 1,500 m from the town centre (N=23 transects). **frequency_PER**: frequency of occurrence in the subset of transects sampled more than 2,700 m from the town centre (N=24 transects).

Five natural history traits of bird species were obtained from the reviews by Tobias et al. (2022) and Morelli et al. (2019): **mass**: body mass in grams. **habitat**: main habitat preference. **migration**: migratory status (0 – resident throughout the year; 1 – tran-saharian migratory species not wintering in the municipality of Pamplona). **rangesize**: world range size in km2. **IE_total**: Overall specialism considering four ecological dimensions (diet, foraging behaviour, foraging substrate, habitat preferences and nesting site).

| *spp* | **birds/transect** | **IC95%low** | **IC95%upp** | **frequency** | **frequency_CEN** | **frequency_PER** | **mass** | **habitat** | **migration** | **rangesize** | **IE_total** |
| --- | --- | --- | --- | --- | --- | --- | --- | --- | --- | --- | --- |
| *Accipiter nisus* | 0.010 | 0.000 | 0.030 | 0.025 | 0.000 | 0.042 | 220.8 | Woodland | 0 | 23601609 | 0.311 |
| *Aegithalos caudatus* | 0.200 | 0.070 | 0.420 | 0.088 | 0.087 | 0.083 | 8.6 | Woodland | 0 | 20041678 | 0.115 |
| *Alcedo atthis* | 0.090 | 0.040 | 0.180 | 0.100 | 0.087 | 0.125 | 31.1 | Riverine | 0 | 24992154 | 0.651 |
| *Alectoris rufa* | 0.050 | 0.010 | 0.150 | 0.050 | 0.000 | 0.083 | 527.9 | Shrubland | 0 | 953692 | 0.238 |
| *Anas platyrhynchos* | 1.190 | 0.580 | 2.570 | 0.150 | 0.174 | 0.167 | 843.4 | Wetland | 0 | 39707247 | 0.183 |
| *Apus apus* | 3.070 | 2.150 | 4.550 | 0.513 | 0.739 | 0.333 | 37.6 | Human mod. | 1 | 24779920 | 0.695 |
| *Aquila pennata* | 0.020 | 0.000 | 0.060 | 0.025 | 0.043 | 0.042 | 823.8 | Woodland | 1 | 6138248 | 0.333 |
| *Ardea cinerea* | 0.060 | 0.020 | 0.110 | 0.088 | 0.087 | 0.125 | 1443.0 | Wetland | 0 | 46421646 | 0.421 |
| *Athene noctua* | 0.010 | 0.000 | 0.040 | 0.013 | 0.043 | 0.000 | 168.9 | Woodland | 0 | 26742299 | 0.128 |
| *Buteo buteo* | 0.010 | 0.000 | 0.030 | 0.025 | 0.000 | 0.083 | 759.1 | Woodland | 0 | 16600070 | 0.427 |
| *Carduelis carduelis* | 4.090 | 3.450 | 4.810 | 0.925 | 1.000 | 0.833 | 16.0 | Woodland | 0 | 15348675 | 0.254 |
| *Certhia brachydactyla* | 0.440 | 0.310 | 0.620 | 0.413 | 0.565 | 0.333 | 8.2 | Woodland | 0 | 3199552 | 0.166 |
| *Cettia cetti* | 0.200 | 0.110 | 0.310 | 0.200 | 0.174 | 0.250 | 13.2 | Riverine | 0 | 5290133 | 0.159 |
| *Chloris chloris* | 2.280 | 1.840 | 2.870 | 0.875 | 0.783 | 0.833 | 26.0 | Woodland | 0 | 10220596 | 0.399 |
| *Cisticola juncidis* | 0.120 | 0.060 | 0.220 | 0.138 | 0.000 | 0.208 | 6.8 | Grassland | 0 | 18929167 | 0.455 |
| *Columba livia* | 6.490 | 4.580 | 10.690 | 0.675 | 0.957 | 0.250 | 354.2 | Human mod. | 0 | 17464191 | 0.630 |
| *Columba palumbus* | 0.270 | 0.170 | 0.450 | 0.288 | 0.261 | 0.375 | 490.0 | Woodland | 0 | 11947217 | 0.238 |
| *Corvus corone* | 0.270 | 0.170 | 0.410 | 0.275 | 0.304 | 0.292 | 570.0 | Woodland | 0 | 33343165 | 0.009 |
| *Corvus monedula* | 0.320 | 0.160 | 0.940 | 0.200 | 0.565 | 0.042 | 246.0 | Human mod. | 0 | 13975046 | 0.094 |
| *Cuculus canorus* | 0.010 | 0.000 | 0.020 | 0.013 | 0.000 | 0.042 | 111.4 | Woodland | 1 | 37338143 | 0.094 |
| *Curruca communis* | 0.030 | 0.000 | 0.090 | 0.025 | 0.000 | 0.083 | 15.1 | Shrubland | 1 | 14124013 | 0.281 |
| *C. melanocephala* | 0.030 | 0.000 | 0.060 | 0.025 | 0.000 | 0.083 | 11.7 | Shrubland | 0 | 1781821 | 0.340 |
| *Cyanistes caeruleus* | 1.160 | 0.860 | 1.690 | 0.525 | 0.609 | 0.542 | 11.1 | Woodland | 0 | 8753390 | 0.078 |
| *Delichon urbicum* | 1.390 | 0.920 | 2.070 | 0.400 | 0.522 | 0.125 | 14.5 | Human mod. | 1 | 26299672 | 0.565 |
| *Dendrocopos major* | 0.190 | 0.110 | 0.280 | 0.213 | 0.217 | 0.167 | 74.9 | Woodland | 0 | 24413724 | 0.159 |
| *Emberiza calandra* | 0.140 | 0.070 | 0.280 | 0.138 | 0.000 | 0.208 | 48.5 | Grassland | 0 | 7483952 | 0.695 |
| *Emberiza cirlus* | 0.210 | 0.120 | 0.360 | 0.213 | 0.000 | 0.292 | 25.6 | Woodland | 0 | 2173408 | 0.565 |
| *Erithacus rubecula* | 0.240 | 0.150 | 0.400 | 0.275 | 0.217 | 0.333 | 17.7 | Woodland | 0 | 10001379 | 0.000 |
| *Falco tinnunculus* | 0.170 | 0.100 | 0.360 | 0.225 | 0.130 | 0.375 | 183.2 | Shrubland | 0 | 49037026 | 0.137 |
| *Fringilla coelebs* | 0.340 | 0.220 | 0.520 | 0.313 | 0.304 | 0.333 | 23.8 | Woodland | 0 | 13931193 | 0.048 |
| *Galerida cristata* | 0.110 | 0.040 | 0.220 | 0.088 | 0.000 | 0.250 | 42.7 | Grassland | 0 | 24389171 | 0.324 |
| *Gallinula chloropus* | 0.160 | 0.040 | 0.470 | 0.063 | 0.087 | 0.042 | 339.6 | Wetland | 0 | 52285239 | 0.150 |
| *Garrulus glandarius* | 0.040 | 0.010 | 0.100 | 0.038 | 0.000 | 0.125 | 159.5 | Woodland | 0 | 22919550 | 0.058 |
| *Hippolais polyglotta* | 0.520 | 0.340 | 0.790 | 0.338 | 0.000 | 0.667 | 11.0 | Woodland | 1 | 1710837 | 0.225 |
| *Hirundo rustica* | 0.060 | 0.020 | 0.160 | 0.063 | 0.000 | 0.042 | 17.9 | Human mod. | 1 | 51701054 | 0.739 |
| *Larus michahellis* | 0.040 | 0.000 | 0.110 | 0.025 | 0.087 | 0.000 | 1111.9 | Coastal | 0 | 858974 | 0.169 |
| *Linaria cannabina* | 0.940 | 0.630 | 1.460 | 0.388 | 0.130 | 0.417 | 19.5 | Shrubland | 0 | 10715477 | 0.268 |
| *Luscinia megarhynchos* | 0.290 | 0.170 | 0.420 | 0.263 | 0.087 | 0.375 | 19.6 | Woodland | 1 | 6778462 | 0.173 |
| *Milvus migrans* | 0.120 | 0.070 | 0.200 | 0.200 | 0.000 | 0.292 | 734.1 | Woodland | 1 | 59168603 | 0.085 |
| *Milvus milvus* | 0.070 | 0.030 | 0.120 | 0.125 | 0.000 | 0.167 | 1071.8 | Woodland | 0 | 1698402 | 0.346 |
| *Motacilla alba* | 0.460 | 0.350 | 0.580 | 0.550 | 0.696 | 0.375 | 23.9 | Human mod. | 0 | 39488712 | 0.140 |
| *Motacilla cinerea* | 0.240 | 0.120 | 0.590 | 0.163 | 0.174 | 0.167 | 17.2 | Riverine | 0 | 19613139 | 0.281 |
| *Motacilla flava* | 0.030 | 0.010 | 0.100 | 0.038 | 0.000 | 0.083 | 17.7 | Grassland | 1 | 28413444 | 0.193 |
| *Oenanthe oenanthe* | 0.060 | 0.000 | 0.170 | 0.025 | 0.000 | 0.000 | 25.4 | Grassland | 1 | 29332213 | 0.128 |
| *Oriolus oriolus* | 0.070 | 0.030 | 0.160 | 0.088 | 0.087 | 0.125 | 79.0 | Woodland | 1 | 13665115 | 0.137 |
| *Parus major* | 0.650 | 0.440 | 0.920 | 0.400 | 0.609 | 0.292 | 16.3 | Woodland | 0 | 32577984 | 0.101 |
| *Passer domesticus* | 7.880 | 6.320 | 10.980 | 0.863 | 0.957 | 0.833 | 26.5 | Human mod. | 0 | 34661700 | 0.159 |
| *Passer montanus* | 0.260 | 0.000 | 0.770 | 0.025 | 0.043 | 0.000 | 21.4 | Woodland | 0 | 39069801 | 0.324 |
| *Periparus ater* | 0.010 | 0.000 | 0.040 | 0.013 | 0.000 | 0.000 | 9.2 | Woodland | 0 | 18987458 | 0.268 |
| *Petronia petronia* | 0.210 | 0.080 | 0.460 | 0.088 | 0.087 | 0.125 | 30.2 | Rock | 0 | 7800913 | 0.159 |
| *Phoenicurus ochruros* | 1.190 | 0.960 | 1.460 | 0.738 | 0.870 | 0.458 | 16.5 | Rock | 0 | 13764225 | 0.193 |
| *Phylloscopus collybita* | 0.070 | 0.030 | 0.120 | 0.100 | 0.130 | 0.167 | 8.3 | Woodland | 0 | 16540252 | 0.384 |
| *Pica pica* | 2.610 | 2.160 | 3.200 | 0.888 | 0.913 | 0.833 | 217.5 | Human mod. | 0 | 32086533 | 0.058 |
| *Picus sharpei* | 0.110 | 0.050 | 0.180 | 0.138 | 0.043 | 0.042 | 176.0 | Woodland | 0 | 6538181 | 0.346 |
| *Regulus ignicapilla* | 0.320 | 0.220 | 0.440 | 0.363 | 0.435 | 0.333 | 5.6 | Woodland | 0 | 2693878 | 0.193 |
| *Riparia riparia* | 0.010 | 0.000 | 0.020 | 0.013 | 0.000 | 0.042 | 12.7 | Riverine | 1 | 42348583 | 0.695 |
| *Saxicola rubicola* | 0.080 | 0.010 | 0.290 | 0.038 | 0.000 | 0.083 | 14.1 | Shrubland | 0 | 32655980 | 0.412 |
| *Serinus serinus* | 1.570 | 1.230 | 1.980 | 0.675 | 0.565 | 0.708 | 11.2 | Woodland | 0 | 4819418 | 0.455 |
| *Streptopelia decaocto* | 0.660 | 0.430 | 1.020 | 0.425 | 0.478 | 0.417 | 149.0 | Human mod. | 0 | 19495952 | 0.673 |
| *Sturnus unicolor* | 1.350 | 1.010 | 1.860 | 0.563 | 0.696 | 0.375 | 83.7 | Woodland | 0 | 826393 | 0.128 |
| *Sylvia atricapilla* | 0.980 | 0.720 | 1.320 | 0.538 | 0.304 | 0.708 | 16.7 | Woodland | 0 | 8628078 | 0.225 |
| *Tachybaptus ruficollis* | 0.030 | 0.000 | 0.070 | 0.013 | 0.000 | 0.042 | 169.4 | Wetland | 0 | 36639882 | 0.499 |
| *Troglodytes troglodytes* | 0.400 | 0.270 | 0.580 | 0.338 | 0.348 | 0.375 | 9.7 | Woodland | 0 | 20939530 | 0.303 |
| *Turdus merula* | 1.160 | 0.910 | 1.560 | 0.788 | 0.609 | 0.917 | 102.7 | Woodland | 0 | 13987855 | 0.213 |
| *Turdus philomelos* | 0.010 | 0.000 | 0.030 | 0.025 | 0.043 | 0.000 | 67.7 | Woodland | 0 | 13727297 | 0.254 |
| *Upupa epops* | 0.120 | 0.050 | 0.220 | 0.125 | 0.130 | 0.083 | 66.9 | Woodland | 1 | 47411719 | 0.259 |
